# Supplementary material
Source: publisher figshare collection journal article supplement (https://acs.figshare.com/ndownloader/files/13117502)
Supplement: Supplementary file 1 [file 13117502]

## Supporting Information

Chemical Protective Textiles of UiO-66 Integrated PVDF Composite Fibers with Rapid  
Heterogeneous Decontamination of Toxic Organophosphates

*Derek B. Dwyer<sup>1</sup>, Nicholas Dugan<sup>2</sup>, Nicole Hoffman<sup>2</sup>, Daniel J. Cooke<sup>1</sup>, Morgan G. Hall<sup>3</sup>,  
Trenton M. Tovar<sup>3</sup>, William E. Bernier<sup>1</sup>, Jared DeCoste<sup>3</sup>, Natalie L. Pomerantz<sup>2</sup>, Wayne E.  
Jones, Jr.<sup>1,4</sup>*

<sup>1</sup>Binghamton University State University of New York, 4400 Vestal Parkway East, Binghamton,  
NY 13902

<sup>2</sup>U.S. Army Natick Soldier Research, Development and Engineering Center, 10 General Greene  
Ave., Natick, MA 01760

<sup>3</sup>Edgewood Chemical Biological Center, U.S. Army Research, Development, and Engineering  
Command, 5183 Blackhawk Road, Aberdeen Proving Ground, Maryland 21010

<sup>4</sup>University of New Hampshire, 105 Main Street, Durham, NH 03824

### Corresponding Author

Wayne E. Jones, Jr. [Wayne.Jones@unh.edu](mailto:Wayne.Jones@unh.edu)

### Materials

Poly(vinylidene fluoride) (PVDF) ( $d=1.74\text{g/mL}$ ,  $M_n=107,000$ ,  $M_w=275,000$ , melt viscosity  $17,500.000\text{--}21,500.000\text{ poise}(100\text{sec}^{-1}, 230^\circ\text{C})$ , Melt index  $7.00\text{--}15.00\text{ g/10min}(230^\circ\text{C}/12.5\text{kg}$ , ASTM D 1238)), titanium (IV) isopropoxide (TTiP), N,N-dimethylformamide (DMF) (anhydrous), 4-nitrophenyl phosphate (methyl paraoxon, DMNP), di-iso-propyl fluorophosphate (DFP), triethanolamine (TEA) and acetone were purchased from Sigma Aldrich and used without any further purification.

## **UiO-66 MOF**

UiO-66 was synthesized by methods published previously.<sup>1</sup> In short, 19.068 mmoles of zirconium (IV) chloride and 19.068 mmoles of benzene dicarboxylate were mixed in 742 ml of dimethyl formamide (DMF) at room temperature in a glass beaker. The resulting mixture was divided in equal parts into three 500 ml glass jars. The jars were placed in a preheated oven at 120 °C for 24 h. The solution was cooled to room temperature, and the resulting solid was repeatedly washed with DMF. DMF was subsequently exchanged with methanol and then activated in a vacuum oven for 24 h.

## **PVDF/Ti(OH)<sub>4</sub>/UiO-66/TEA nanofibers**

PVDF/Ti(OH)<sub>4</sub>/UiO-66/Triethanolamine(TEA) NFs were fabricated by first dissolving 360 mg of PVDF in 2 mL of DMF (anhydrous) using a combination of sonication and heating at 50°C. 194 mg of UiO-66 MOF was then added to the sol-gel and stirred for 30 min. 640 mg (0.67 mL) of titanium (IV) isopropoxide (TTiP) and 1 mL of acetone was added and the sol-gel was stirred for another 30 min. Finally, 0.70 mL (787 mg) of TEA base was added to the sol-gel and stirred for a final 30 min before electrospinning the sol-gel. Two vials of sol-gel were prepared and electrospun onto a single aluminum foil at 15.5 cm and voltage of 25 kV to create a thicker fiber mat that could be easily removed from the collector in one piece. The final NF mat was left out overnight to dry before testing. PVDF/Ti(OH)<sub>4</sub>/UiO-66 NFs were fabricated using the same procedure but without addition of the TEA base.

## **Characterization**

The materials were characterized using a Supra 55 VP field emission scanning electron microscope (SEM) from Zeiss equipped with energy dispersive X-ray spectroscopy (EDS) detector. Attenuated total reflectance Fourier transform infrared spectroscopy (ATR-FTIR) was performed using an IRAffinity-1S equipped with a MIRacle single reflection horizontal ATR accessory.

### **MVTR and air permeation**

The moisture vapor transport rate (MVTR) and air permeation were measured with a dynamic moisture permeation cell (DMPC) according to ASTM F2298. A schematic of the permeation cell is shown in Figure S1. The humidity of the feed and sweep streams were set to 95% and 5%, respectively, for a mean relative humidity of 50%. Only one mean relative point is necessary to characterize the MVTR of the electrospun composite as the water transport through nanofibers is not dependent on concentration like polymer membranes.<sup>2</sup> To measure the MVTR of air permeable materials, the pressure drop across the sample is increased stepwise while the relative humidity of both feed and sweep streams remain constant. The MVTR is measured at each stepwise increase in pressure difference, and a linearization used to determine the MVTR at  $\Delta P = 0$ . Development and use of the DMPC test method has been documented by Gibson et al., 1995.<sup>3</sup>

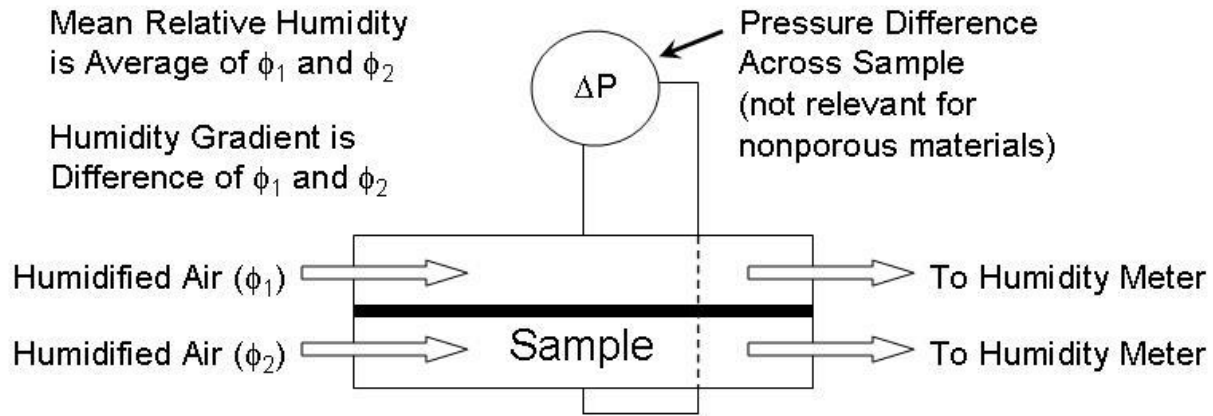

**Figure S1.** Schematic of dynamic moisture permeation cell (DMPC).<sup>3</sup>

### Aerosol filtration efficiency test

The materials were examined using a TSI Automated Filter Tester Model 3160 that measures particle penetration versus particle size at a set aerosol flow rate (face velocity). TSI 3160 can generate polydisperse dioctylphthalate (DOP, oil) and NaCl aerosol particles in the range of 0.015 to 0.8 microns using an atomizer. The TSI 3160 is capable of measuring efficiencies up to 99.999999%. The TSI 3160 is equipped with two TSI Model 3772 Condensation Particle Counters (CPCs). The Model 3772 CPC detects particles as small as 0.010 microns in diameter and employs single-particle-count-mode operation to measure concentrations up to 10,000 particles per cubic centimetre. The detector counts individual pulses produced as each particle (droplet) passes through the sensing zone. A high signal-to-noise ratio and continuous, live-time coincidence correction provides accuracy even at very low concentrations. The Model 3772 CPC uses a laser-diode light source and diode photodetector to collect scattered light from particles. The TSI 3160 is also equipped with a TSI Model 3302A Diluter to reduce the particle

concentration of high-concentration aerosols. The Diluter is calibrated for dilution ratios of 100:1 and 20:1 at a total flow rate of 5 standard litre per minute.

### **Hydrolysis of methyl paraoxon (DMNP) simulant**

Degradation experiments were performed following a previously published procedure by Katz et al.<sup>4</sup> First, an aqueous buffer solution (pH 10) of N-ethyl morpholine (0.45 M) was prepared. In a 4 mL glass vial 12 mg of polymer/MOF catalyst was added to 1 mL of distilled water. The reaction was performed in distilled water to evaluate the self-buffering capability of the TEA in the NFs. The fiber was stirred in the solution for 30 min at a stir speed of 750 rpm. Next, 4  $\mu$ L of DMNP simulant was added to the solution. 10  $\mu$ L aliquots were taken from the reaction at specified times and diluted to 5 mL with the prepared buffer solution for analysis with UV-Visible spectroscopy using an Hewlett Packard Diode array spectrophotometer. Product formation was observed by tracking the 4-nitrophoxide product peak at 407 nm. The DMNP simulant and its degradation products are shown in Scheme 1.

### **Di-iso-propyl Fluorophosphate (DFP) simulant testing**

Catalytic activity against the simulant DFP was evaluated by cutting a 1 cm<sup>2</sup> sample of composite fabric and preconditioning at 100% RH for at least 24 hours. The sample was then spiked with 1  $\mu$ L of DFP. The reaction was monitored using <sup>31</sup>P high resolution (HR) magic angle spinning (MAS) nuclear magnetic resonance (NMR) spectroscopy on a Bruker Advance 400 MHz spectrometer.

### **GD agent testing**

GD agent testing was performed using the same procedure published in Lu et al.<sup>5</sup> Swatches of 1x2 cm size were cut and placed into a Thunder Scientific Corporation Series 2500 Humidity Chamber at 25 °C. The samples were conditioned at 50% RH for at least 16 h. Next, a 2.6 µl drop of soman (GD) was deposited onto the inside surface of the fabric sample in the rotor. <sup>31</sup>P NMR spectra were obtained over time at ambient temperature (25 °C) without spinning using a Varian INOVA 400 NB NMR spectrometer equipped with a Doty Scientific 10-mm NMR probe to monitor the reaction and identify products.

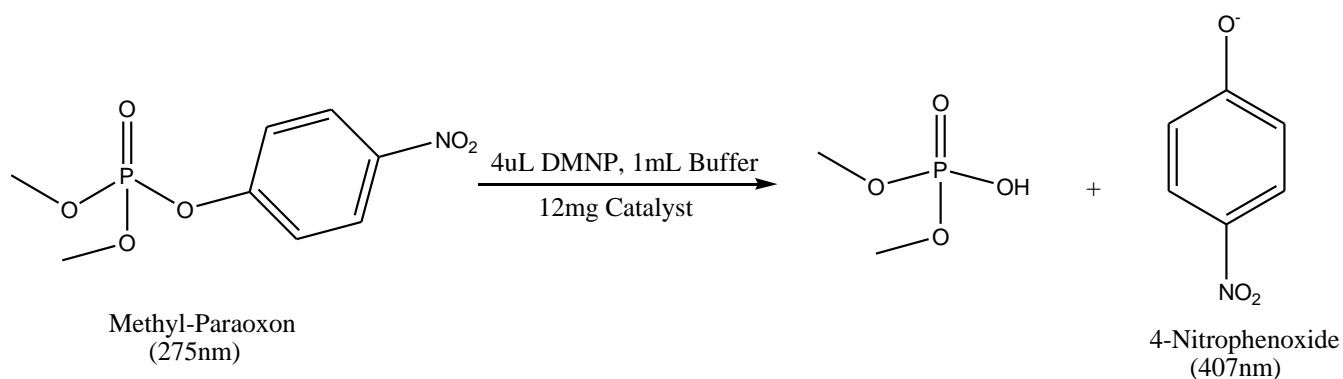

**Scheme S1.** Reaction of DMNP simulant with catalyst in buffered solution.

**Table S1.** MVTR and air permeation of FR fabric 1, carbon-based material and PVDF composite fibers.

| Sample                               | MVTR (g/m <sup>2</sup> /day) | Air Perm. (ft <sup>3</sup> /min/ft <sup>2</sup> ) |
|--------------------------------------|------------------------------|---------------------------------------------------|
| PVDF/Ti(OH) <sub>4</sub>             | 18100                        | 5.2                                               |
| PVDF/Ti(OH) <sub>4</sub> /UiO-66     | 15800                        | 5.7                                               |
| PVDF/Ti(OH) <sub>4</sub> /UiO-66/TEA | 14200                        | 2.8                                               |
| Carbon based material                | 4300                         | 12.1                                              |
| FR Fabric 1                          | 13300                        | 61.6                                              |

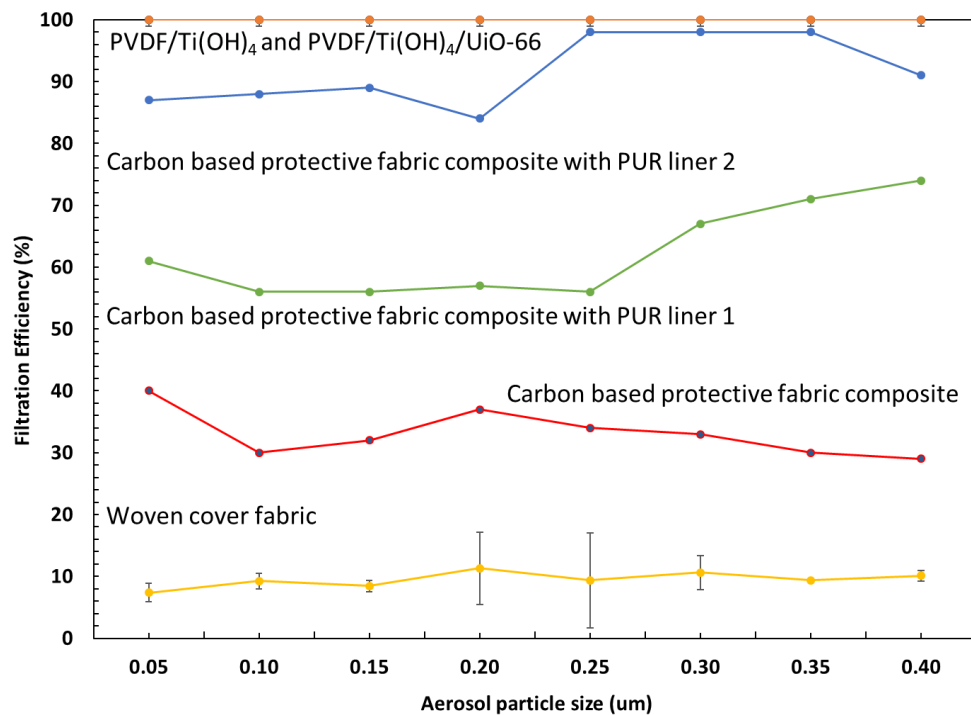

**Figure S2.** Filtration efficiency of PVDF/Ti(OH)<sub>4</sub> and PVDF/Ti(OH)<sub>4</sub>/UiO-66 compared to other fabric and carbon-based materials.

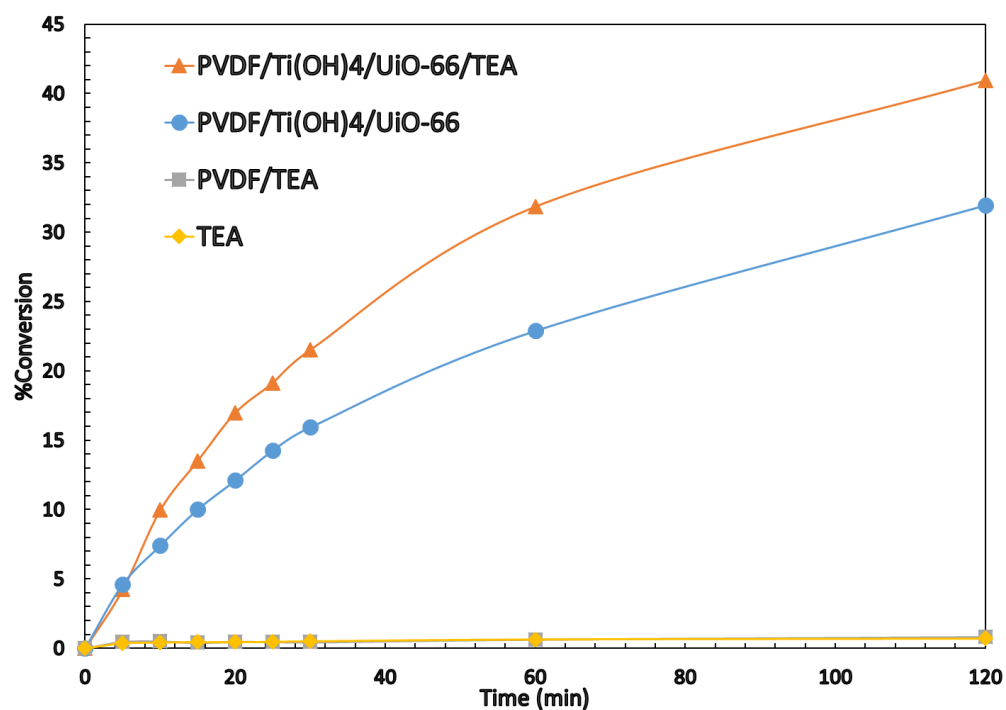

**Figure S3.** Percent conversion of DMNP for PVDF/Ti(OH)<sub>4</sub>/UiO-66, PVDF/Ti(OH)<sub>4</sub>/UiO-66/TEA, PVDF/TEA composites and TEA performed in distilled water.

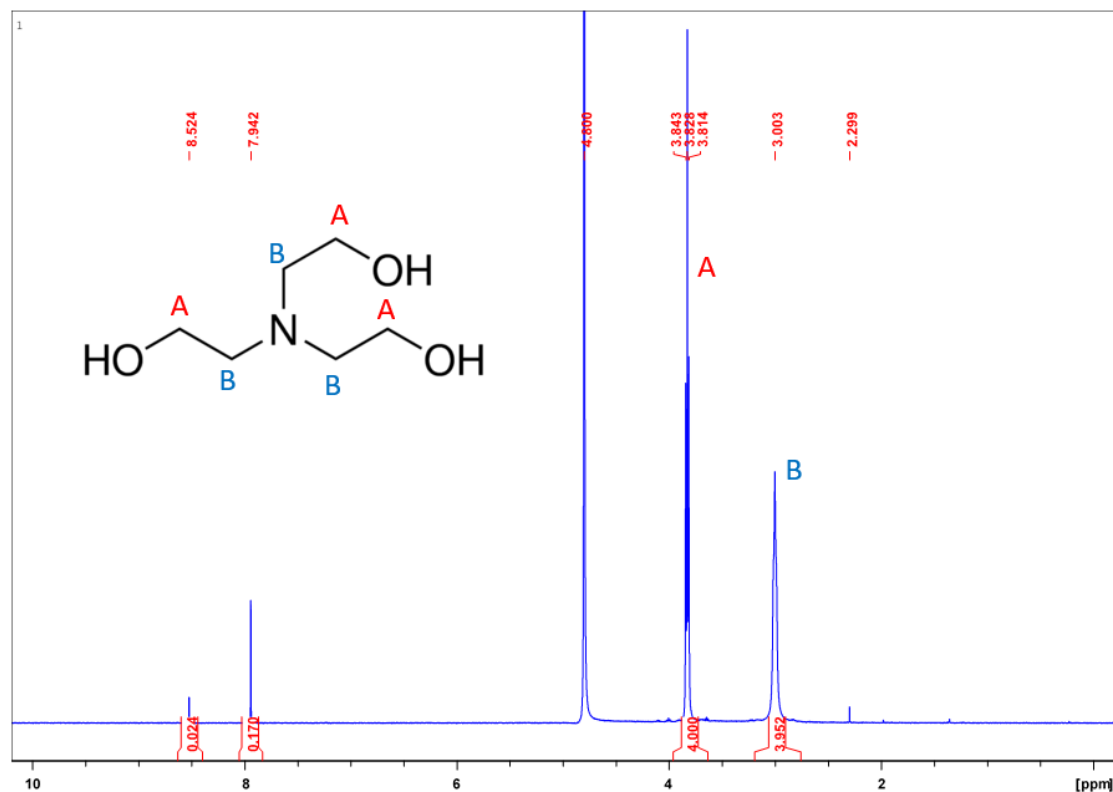

**Figure S4:** <sup>1</sup>H-NMR of D<sub>2</sub>O after soaking with PVDF/Ti(OH)<sub>4</sub>/UiO-66/TEA composite showing evidence of TEA leaching from composite.



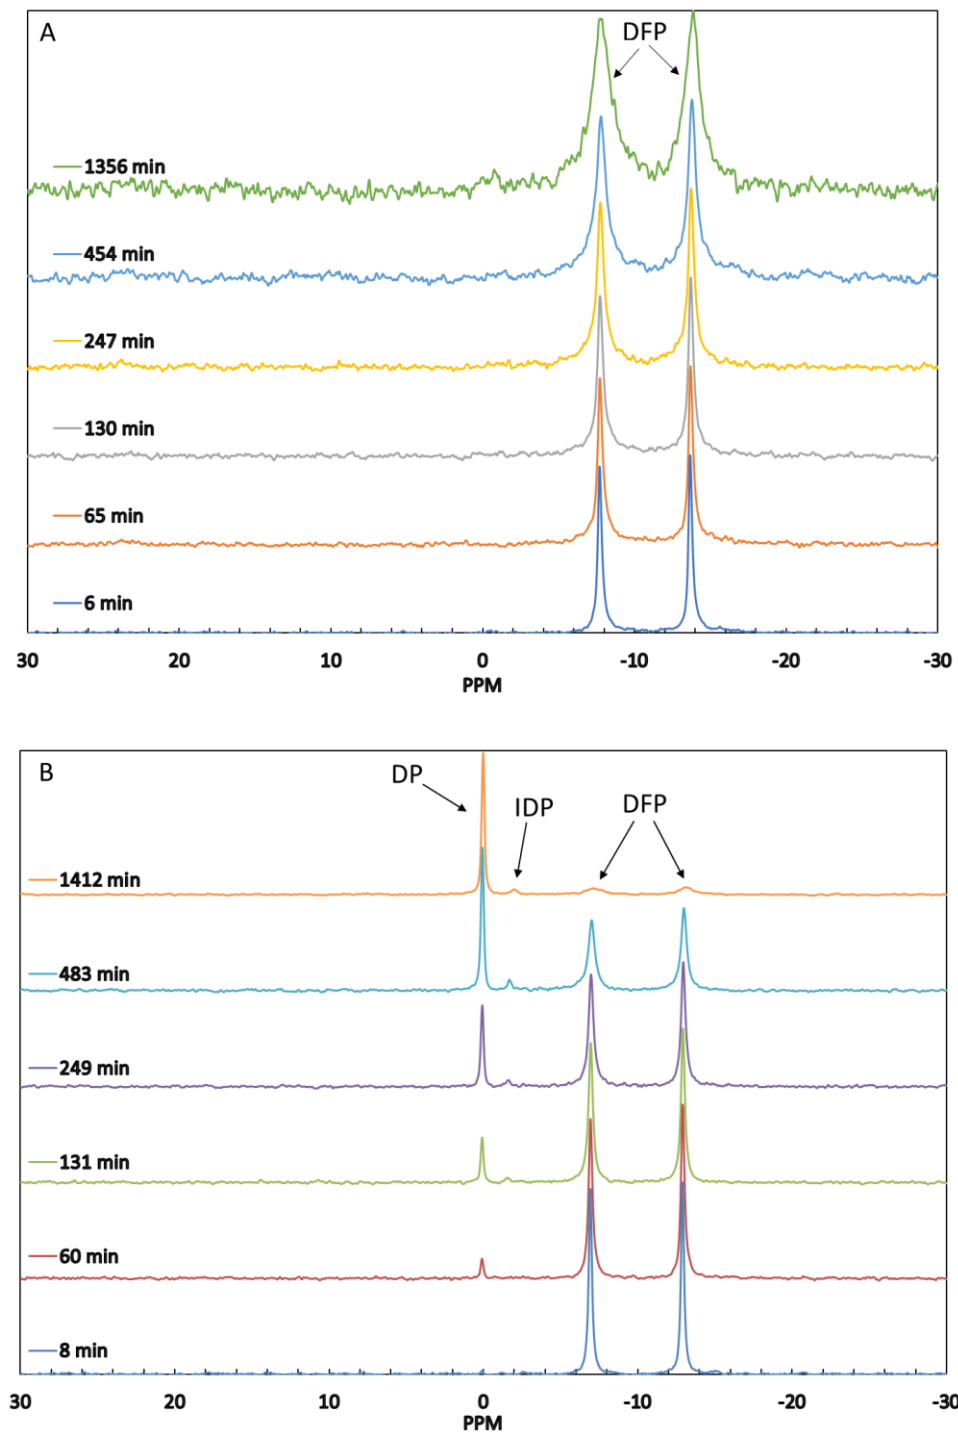

**Figure S5.** Solid state  $^{31}\text{P}$  HR MAS NMR of DFP degradation with PVDF/Ti(OH) $_4$ /UiO-66 (A) and PVDF/Ti(OH) $_4$ /UiO-66/TEA (B) composite fibers.

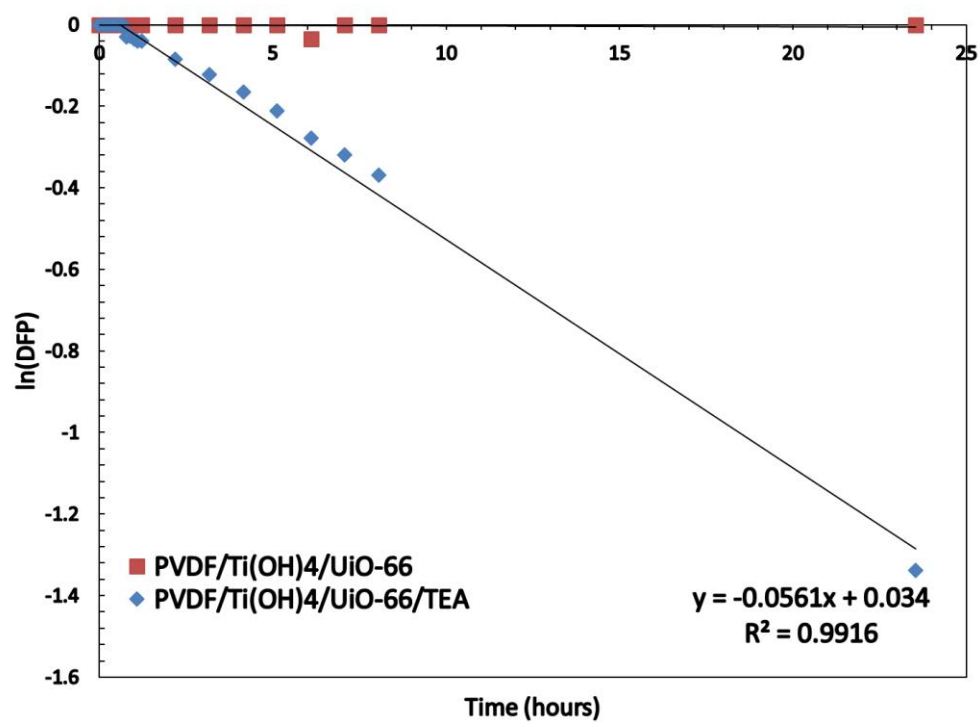

**Figure S6.** Kinetic analysis of DFP degradation with PVDF/Ti(OH)<sub>4</sub>/UiO-66 and PVDF/Ti(OH)<sub>4</sub>/UiO-66/TEA composite fibers.

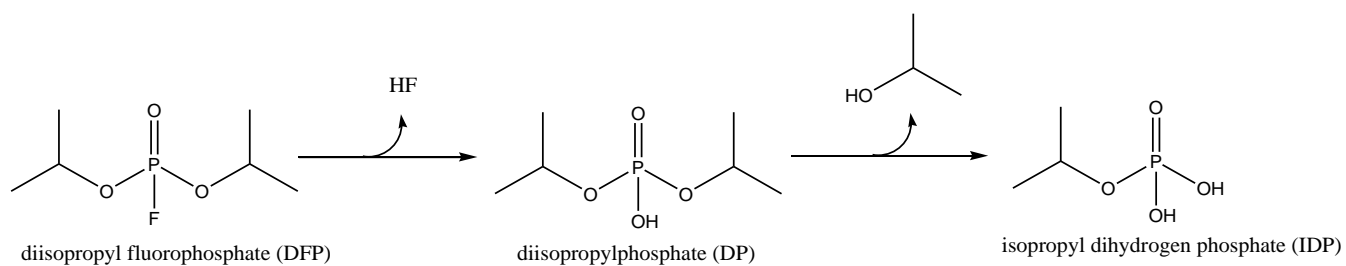

**Scheme S2.** Degradation steps and by-product(s) of DFP.

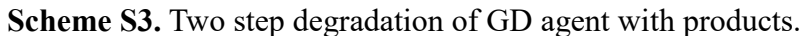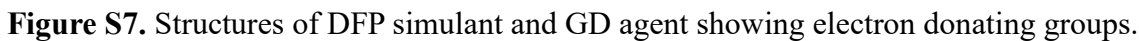

| Sample                               | $t_{1/2}$ (mins) | ref                          |
|--------------------------------------|------------------|------------------------------|
| PVDF/Ti(OH) <sub>4</sub> /UiO-66     | 35               | this work                    |
| PVDF/Ti(OH) <sub>4</sub> /UiO-66/TEA | 47               | this work                    |
| 20PS-25U-DMF/THF                     | 95               | Peterson et al. <sup>6</sup> |
| 10PS-25U-DMF                         | 98               | Peterson et al. <sup>6</sup> |
| MOFabric-33%                         | 131              | Lu et al. <sup>5</sup>       |
| 20PS-25U-DMF                         | 144              | Peterson et al. <sup>6</sup> |
| 10PS-25U-DMF/THF                     | 154              | Peterson et al. <sup>6</sup> |
| MOFabric-19%                         | 161              | Lu et al. <sup>5</sup>       |
| PVDF/Ti(OH) <sub>4</sub>             | 277              | this work                    |
| PVDF/UiO-66                          | 365              | this work                    |
| MOFabric-13%                         | 1155             | Lu et al. <sup>5</sup>       |
| MOFabric-7%                          | 1616             | Lu et al. <sup>5</sup>       |

11

| Sample                           | Contact Angle | Image                                                                              |
|----------------------------------|---------------|------------------------------------------------------------------------------------|
| PVDF                             | 138           |  |
| PVDF/Ti(OH) <sub>4</sub>         | 0             |                                                                                    |
| PVDF/UiO-66                      | 139           |  |
| PVDF/Ti(OH) <sub>4</sub> /UiO-66 | 0             |                                                                                    |

## REFERENCES

1. Peterson, G. W.; DeCoste, J. B.; Glover, T. G.; Huang, Y. G.; Jasuja, H.; Walton, K. S., Effects of Pelletization Pressure on the Physical and Chemical Properties of the Metal-Organic Frameworks Cu-3(BTC)(2) and UiO-66. *Microporous and Mesoporous Materials* **2013**, 179, 48-53.
2. Gibson, P. W.; Schreuder-Gibson, H.; Rivin, D. Transport Properties of Porous Membranes based on Electrospun Nanofibers. *Colloids and Surfaces A: Physicochemical and Engineering Aspects* **2001**, 187–188, 469–481.
3. Gibson, P.; Kendrick, C.; Rivin, D.; Chramchi, M.; Sicuranza, L. An Automated Dynamic Water Vapor Permeation Test Method. *Natick Technical Report* **1995** NATICK/TR-95/032.
4. Katz, M. J.; Mondloch, J. E.; Totten, R. K.; Park, J. K.; Nguyen, S. T.; Farha, O. K.; Hupp, J. T., Simple and Compelling Biomimetic Metal-Organic Framework Catalyst for the Degradation of Nerve Agent Simulants. *Angewandte Chemie-International Edition* **2014**, 53 (2), 497-501.

5. Lu, A. X.; McEntee, M.; Browe, M. A.; Hall, M.; DeCoste, J. B.; Peterson, G. W., MOFabric: Electrospun Nanofiber Mats from PVDF/ UiO-66-NH<sub>2</sub> for Chemical Protection and Decontamination. *ACS Applied Materials & Interfaces* **2017**, 9, 13632-13636.
6. Peterson, G. W.; Lu, A. X.; Epps, T. H., Tuning the Morphology and Activity of Electrospun Polystyrene/UiO-66-NH<sub>2</sub> Metal-Organic Framework Composites to Enhance Chemical Warfare Agent Removal. *ACS Applied Materials & Interfaces* **2017**, 9 (37), 32248-32254.
